# Supplementary material
Source: PubMed Central journal article supplement (PMC6630532)

## SUPPLEMENTAL INFORMATION

### Multimodal tracking of (controlled) *Staphylococcus aureus* infections in mice

Mick M. Welling<sup>a#</sup>, Clarize M. de Korne<sup>a,c</sup>, Silvia. J. Spa<sup>a</sup>, Danny M. van Willigen<sup>a</sup>, Albertus W. Hensbergen<sup>a</sup>, Anton Bunschoten<sup>a,b</sup>, Nikolas Duszenko<sup>a,c</sup>, Wiep Klaas Smits<sup>d</sup>, Meta Roestenberg<sup>c</sup>, Fijs W. B. van Leeuwen<sup>a,b</sup>

<sup>a</sup> Interventional Molecular Imaging Laboratory, Department of Radiology, Leiden University Medical Center, Leiden, the Netherlands

<sup>b</sup> Laboratory of BioNanoTechnology, Department of Agrotechnology and Food Sciences, Wageningen University & Research, Wageningen, the Netherlands

<sup>c</sup> Department of Parasitology and Department of Infectious Diseases, Leiden University Medical Center, Leiden, the Netherlands

<sup>d</sup> Department of Medical Microbiology, Section Experimental Bacteriology, Leiden University Medical Center, Leiden, the Netherlands

# Corresponding author; Mick M. Welling, E-mail: [m.m.welling@lumc.nl](mailto:m.m.welling@lumc.nl)

Page S1: Title page

Page S2: Table S1

Page S3: Figure S1

Page S4: Figure S2

Page S5: Figure S3

Page S6: Figures S4a & b

Page S7: Figure S5

Page S8: Figure S6

Page S9: Figure S7

Page S10: Figure S8a-c

Page S11: Figure S9a-d

**Table S1.** The biodistribution of I.M. administered  $^{99m}\text{Tc-UBI}_{29-41}\text{-Cy5-N3}$  labelled *S. aureus*. Data (expressed as the mean  $\pm$  SD of the percentage of the injected dose per gram tissue (%ID/g) of 3 observations) were calculated based on the radioactive counts measured in various tissues at 4 h, 20 h, and 28 h post-injection of the radioactive tracer.

| Tissue                      | %ID/g             |                     |                     |
|-----------------------------|-------------------|---------------------|---------------------|
|                             | 4 h p.i.          | 20 h p.i.           | 28 h p.i.           |
| Blood                       | 1.98 $\pm$ 0.53   | 0.15 $\pm$ 0.11     | 0.13 $\pm$ 0.03     |
| Thyroid gland               | 1.37 $\pm$ 0.32   | 0.79 $\pm$ 1.07     | 1.14 $\pm$ 0.66     |
| Salivary gland              | 6.12 $\pm$ 1.23   | 3.36 $\pm$ 5.09     | 2.51 $\pm$ 1.90     |
| Heart                       | 0.83 $\pm$ 0.16   | 0.46 $\pm$ 0.70     | 0.37 $\pm$ 0.25     |
| Lungs                       | 1.40 $\pm$ 0.37   | 0.59 $\pm$ 0.91     | 0.40 $\pm$ 0.30     |
| Bladder                     | 82.06 $\pm$ 33.50 | 10.85 $\pm$ 15.04   | 3.64 $\pm$ 2.70     |
| Liver                       | 8.75 $\pm$ 1.09   | 4.77 $\pm$ 6.33     | 4.15 $\pm$ 3.74     |
| Spleen                      | 0.89 $\pm$ 0.33   | 0.86 $\pm$ 1.37     | 1.19 $\pm$ 0.47     |
| Kidneys                     | 33.67 $\pm$ 6.30  | 11.26 $\pm$ 16.72   | 8.67 $\pm$ 7.61     |
| Stomach                     | 3.90 $\pm$ 4.66   | 2.93 $\pm$ 4.07     | 2.87 $\pm$ 2.25     |
| Intestines                  | 17.90 $\pm$ 14.05 | 1.43 $\pm$ 1.69     | 1.96 $\pm$ 0.72     |
| Infected muscle             | 51.91 $\pm$ 19.53 | 42.12 $\pm$ 21.52   | 44.44 $\pm$ 25.70   |
| Control muscle              | 0.66 $\pm$ 0.21   | 0.63 $\pm$ 0.42     | 1.38 $\pm$ 1.33     |
| Brains                      | 0.13 $\pm$ 0.04   | 0.06 $\pm$ 0.08     | 0.08 $\pm$ 0.03     |
| Excretion (%ID; cumulative) | 42.90 $\pm$ 22.47 | 78.21 $\pm$ 8.33    | 83.16 $\pm$ 8.32    |
| Infection-to-blood ratio    | 27.99 $\pm$ 13.17 | 301.20 $\pm$ 120.83 | 359.20 $\pm$ 227.78 |
| Control-to-blood ratio      | 0.35 $\pm$ 0.15   | 4.23 $\pm$ 2.51     | 9.76 $\pm$ 7.84     |

**Figure S1.** Chemical synthesis pathway of UBI<sub>29-41</sub>-Cy5-N<sub>3</sub>. **a)** NaN<sub>3</sub>, DMF, 50°C; **b)** 6-bromohexanoic acid, CH<sub>3</sub>CN, 60°C; **c)** CH<sub>3</sub>CN, 55°C; **d)** DiPEA, Ac<sub>2</sub>O, CH<sub>2</sub>Cl<sub>2</sub>, 0 °C to R.T.; **e)** NaOAc, EtOH, R.T.; **f)** HSPyU, DiPEA, DMSO, R.T.; **g)** UBI<sub>29-41</sub>, 0.1M phosphate buffer pH 8.5/DMSO 3:1, R.T.

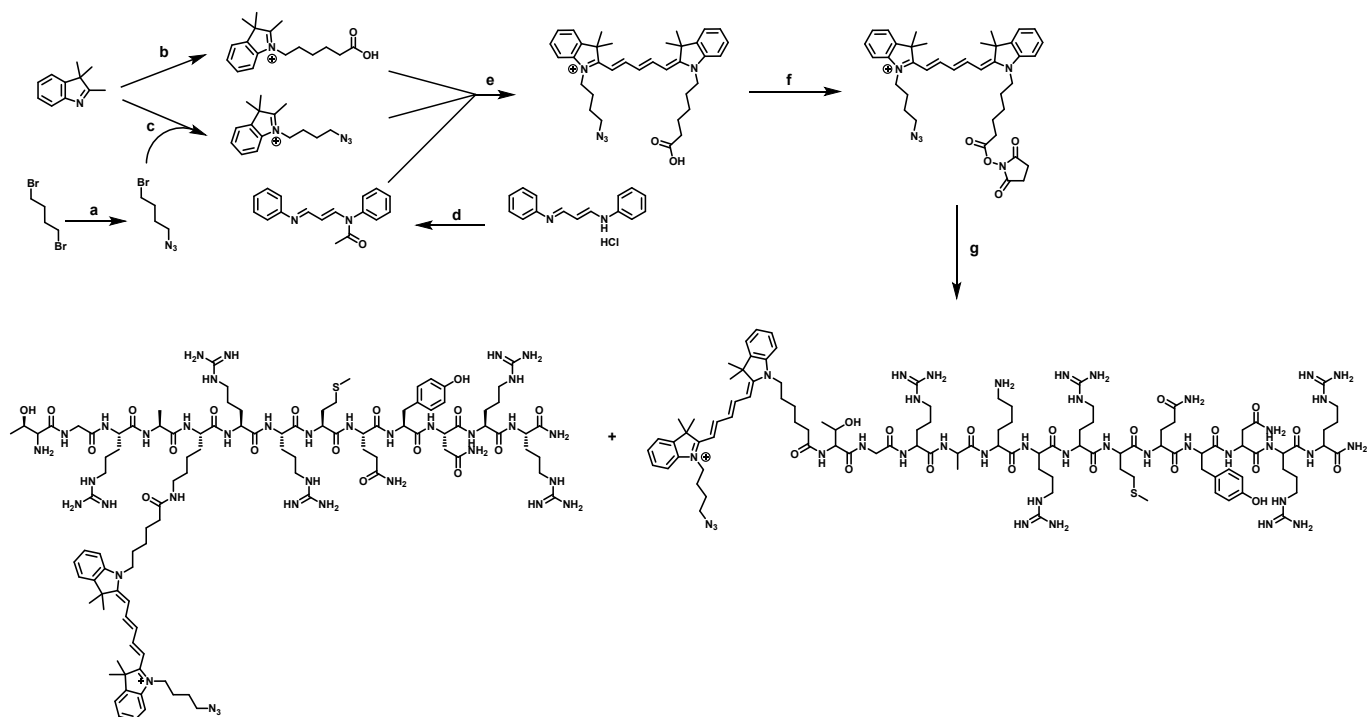

**Figure S2.** MALDI-TOF spectrum of 1-(4-azidobutyl)-2-((1E,3E)-5-((E)-1-(5-carboxypentyl)-3,3-dimethylindolin-2-ylidene)penta-1,3-dien-1-yl)-3,3-dimethyl-3H-indol-1-ium.

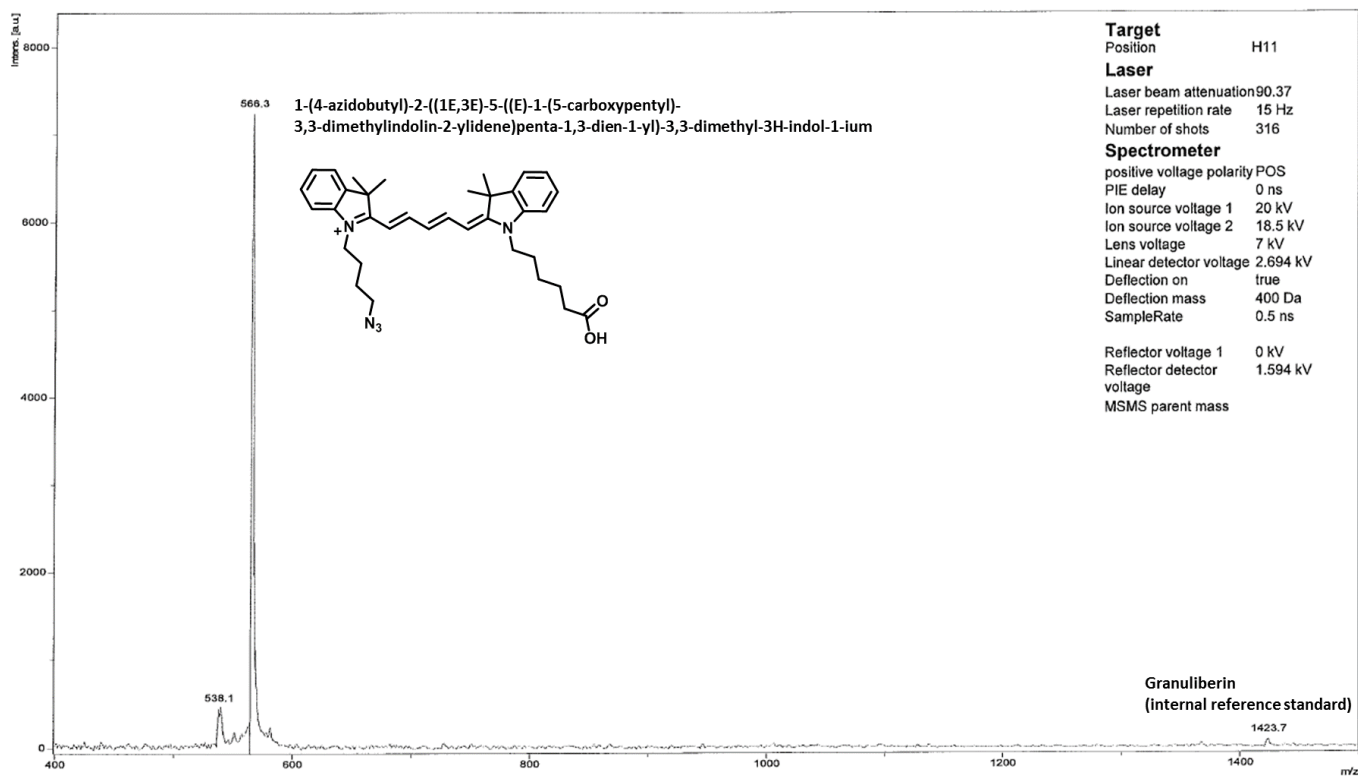

**Figure S3.** MALDI-TOF spectrum of 1-(4-azidobutyl)-2-((1E,3E)-5-((E)-1-(6-((2,5-dioxopyrrolidin-1-yl)oxy)-6-oxohexyl)-3,3-dimethylindolin-2-ylidene)penta-1,3-dien-1-yl)-3,3-dimethyl-3H-indol-1-ium.

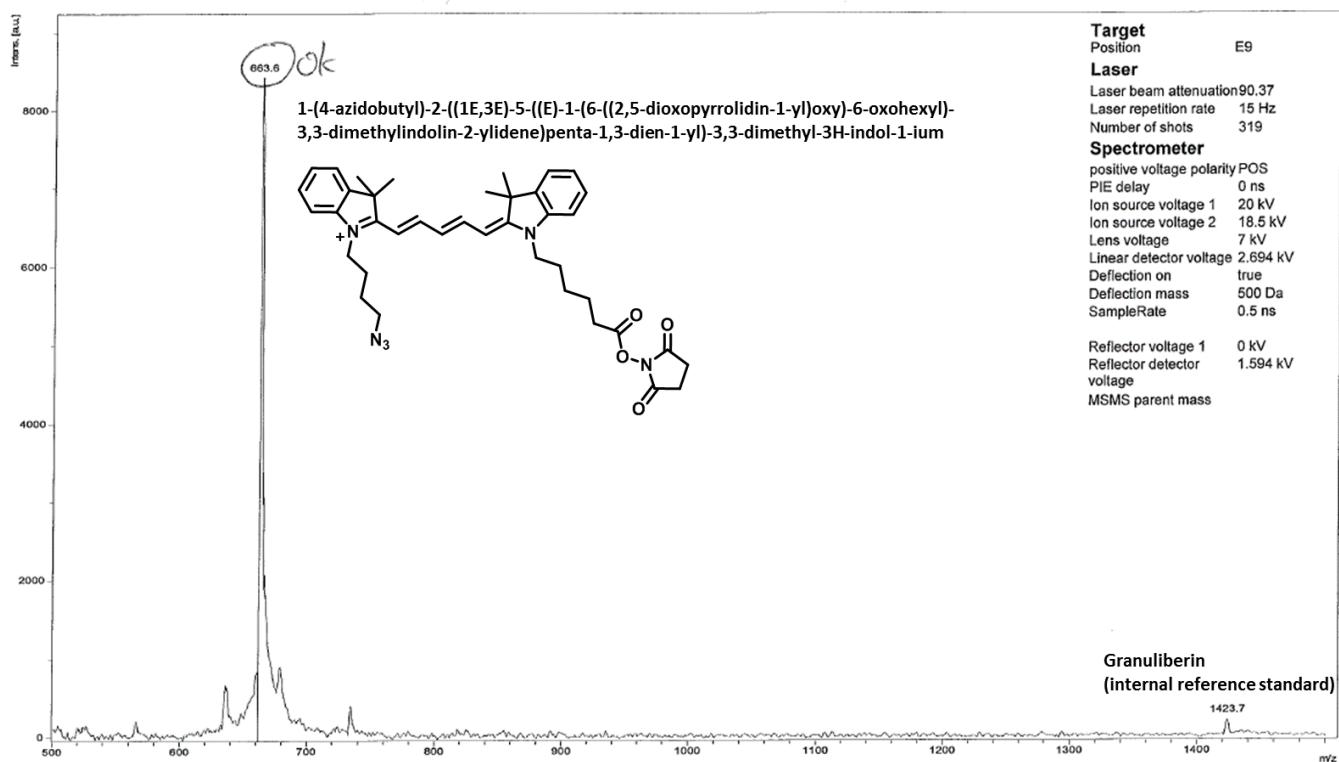

**Figure S4a.**  $^1\text{H-NMR}$  spectrum of 1-(4-azidobutyl)-2-((1E,3E)-5-((E)-1-(6-((2,5-dioxopyrrolidin-1-yl)oxy)-6-oxohexyl)-3,3-dimethylindolin-2-ylidene)penta-1,3-dien-1-yl)-3,3-dimethyl-3H-indol-1-ium.

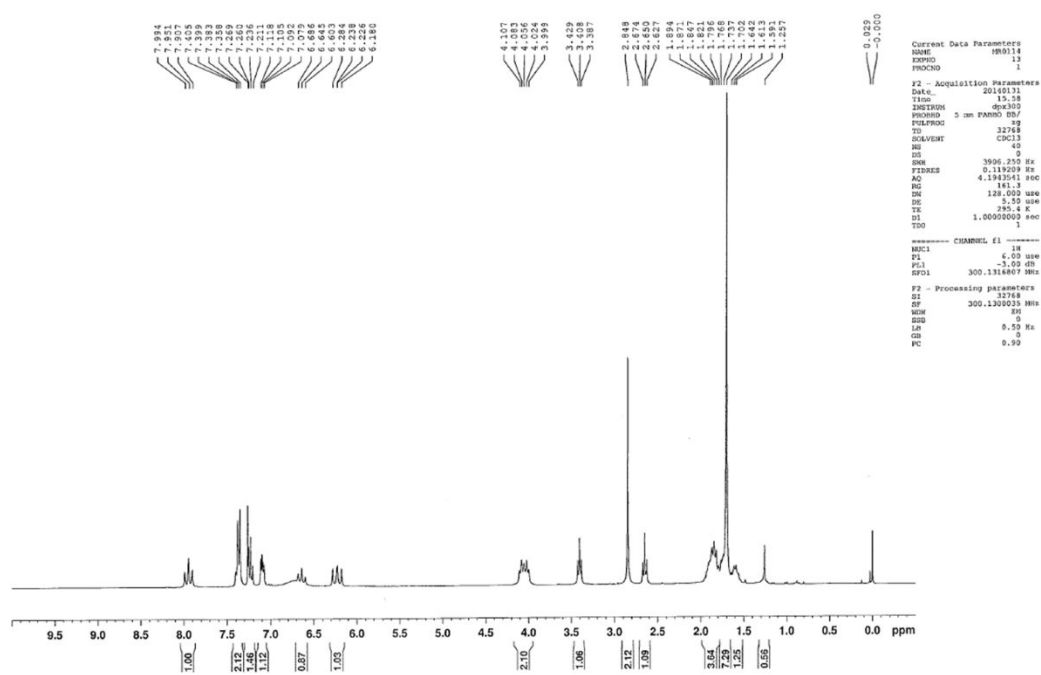

**Figure S4b.** Zoomed in on the aromatic peak area of the  $^1\text{H-NMR}$  spectrum of 1-(4-azidobutyl)-2-((1E,3E)-5-((E)-1-(6-((2,5-dioxopyrrolidin-1-yl)oxy)-6-oxohexyl)-3,3-dimethylindolin-2-ylidene)penta-1,3-dien-1-yl)-3,3-dimethyl-3H-indol-1-ium.

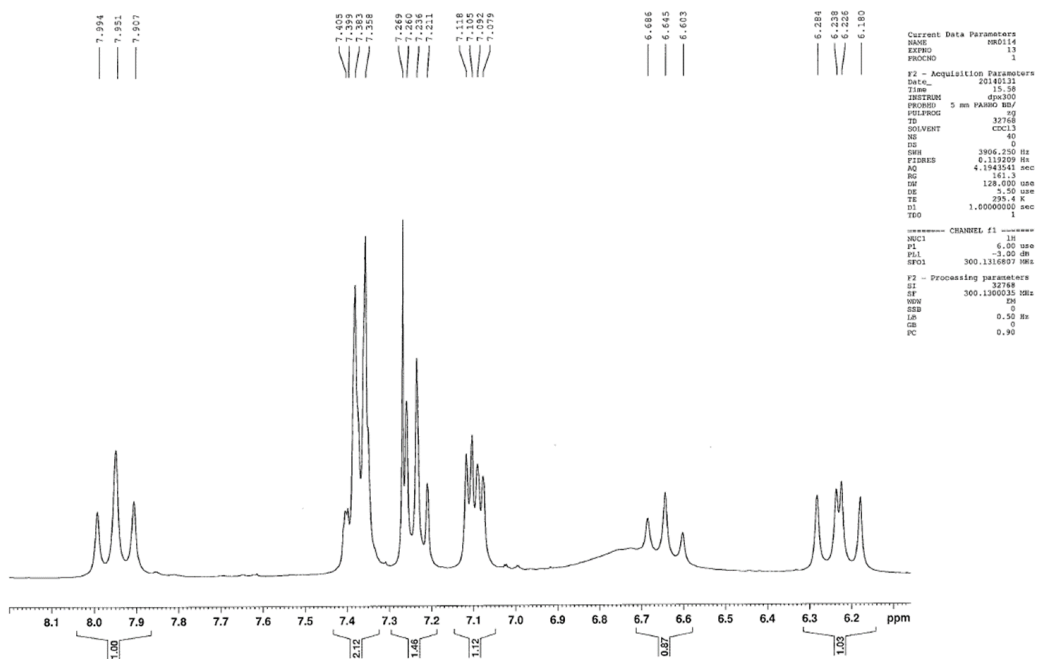

**Figure S5.** HPLC reverse-phase chromatography of the purification and characterization of UBI<sub>29-41</sub>-Cy5-N<sub>3</sub>. Chromatogram with the collected product peaks depicted by red arrow/lines.

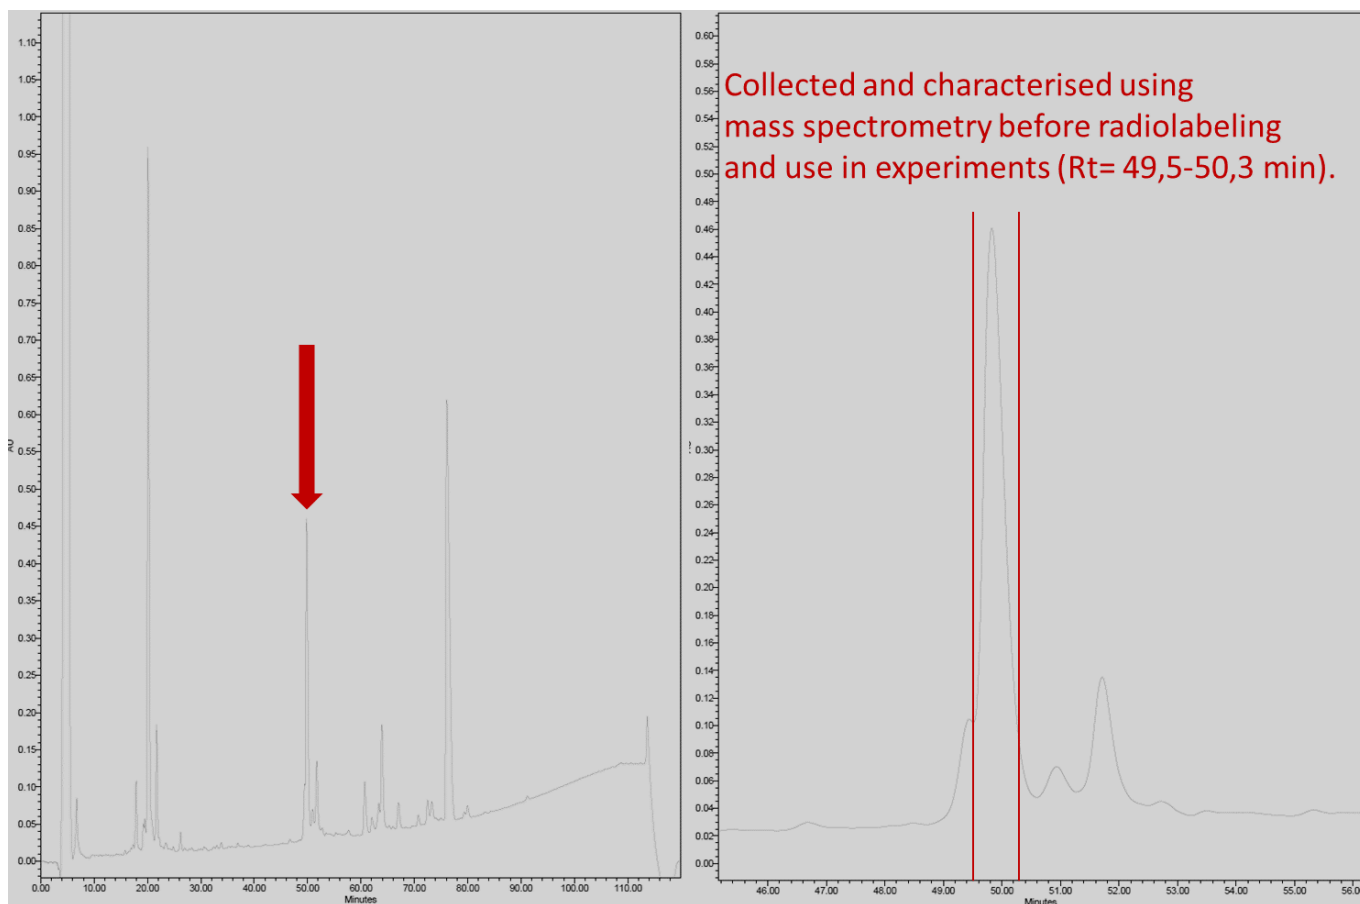

**Figure S6.** MALDI-TOF spectrum of HPLC purified UBI<sub>29-41</sub>-Cy5-N<sub>3</sub>. The red asterisk represents an alternative attachment point of the dye. This, however, will not change the recorded mass.

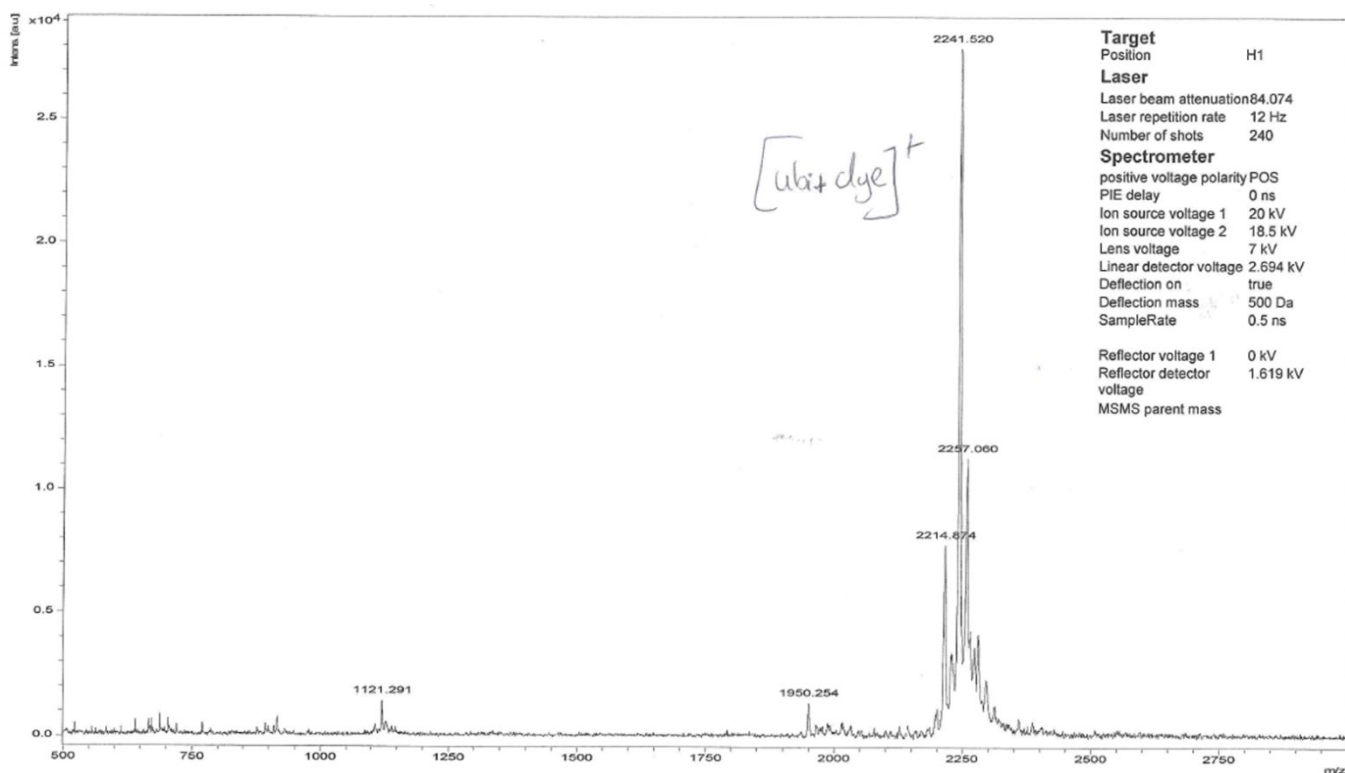



**Figure S7.** Schematic depiction of  $^{99m}\text{Tc}$  labeled  $\text{UBI}_{29-41}\text{-Cy5-N}_3$  according to Meléndez-Alafort *et al.* Nucl Med Biol. 2003;30(6):605. However, it is likely that other binding modes are also present in solution.

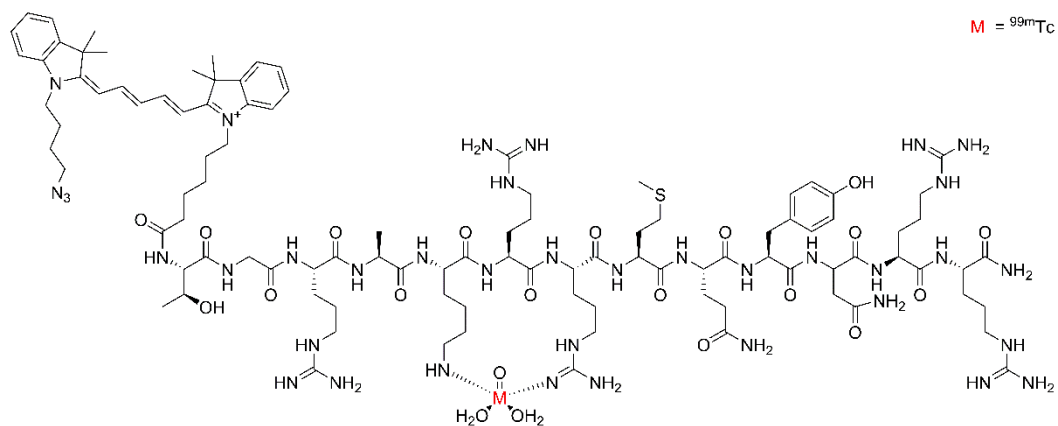

**Figure S8. A)** BHI agar plates containing serial dilutions of *S. aureus* from urine samples. **B)** assessment of viable bacteria in urine at various intervals after I.M. injection of  $1 \times 10^7$  CFU bacteria. Control = urine collected from non-infected mice. BDL = CFU's below detection limit. **C)** Radioactivity ( $^{99m}\text{Tc}$  expressed as %ID) and fluorescence (Cy5, expressed as Total Flux (p/s)/pixel) measurements in urine samples. Data are expressed as the mean of 3 observations. Error bars represent the standard deviation.

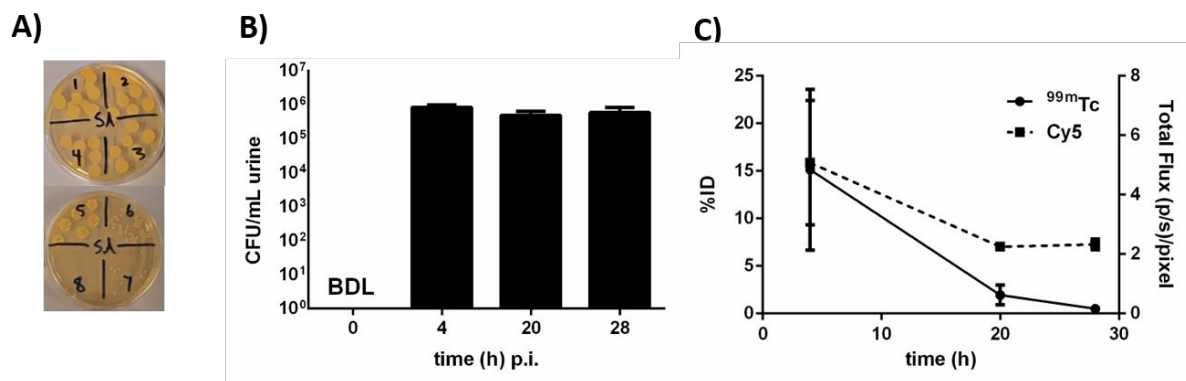

**Figure S9.** Confocal microscopic imaging of phagocytosis of UBI<sub>29-41</sub>-Cy5-N<sub>3</sub> labeled *S. aureus* by human macrophages. Images were taken at t = 0 (A), 6 (B), and 30 (C) min. A few examples are highlighted with arrows indicating free (white arrow) or phagocytosed (yellow arrow) *S. aureus*. Grey = bright field, blue = Hoechst, red = Cy5. D) = UBI<sub>29-41</sub>-Cy5-N<sub>3</sub> labeled dead *S. aureus*.

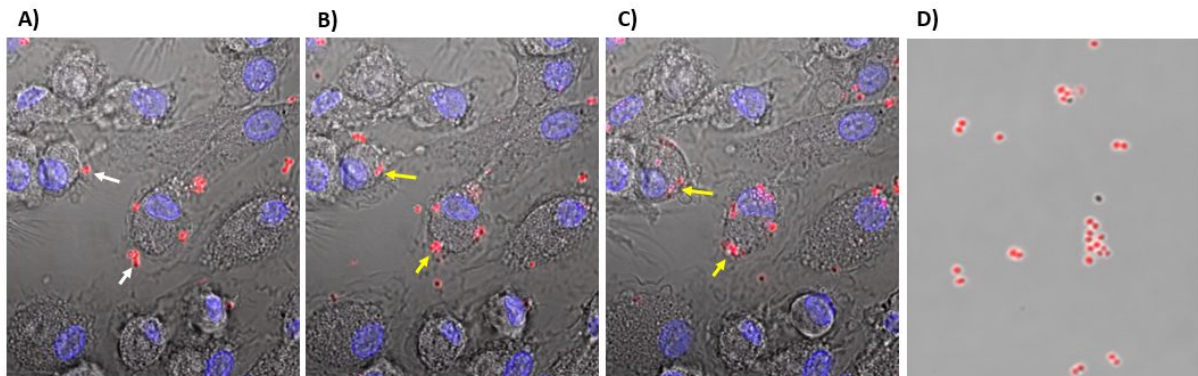

Supplement: id9b00015_si_001.pdf [file id9b00015_si_001.pdf]
